# Supplementary material
Source: PubMed Central journal article supplement (PMC3980895)

## Legends for Supplementary Figures

### Figure 1a

Distribution of p-values  $[0,1]$  from the variable-specific component of the Combined multivariate approach under the null. Results are shown for simulation scenarios a-i.

### Figure 1b

Distribution of p-values  $[0,1]$  from the factor-level component of the Combined multivariate approach under the null. Results are shown for simulation scenarios a-i.

Distribution of p-values [0,1] under the null hypothesis: Variable specific test

Unrelateds 3 variables – High factor loadings

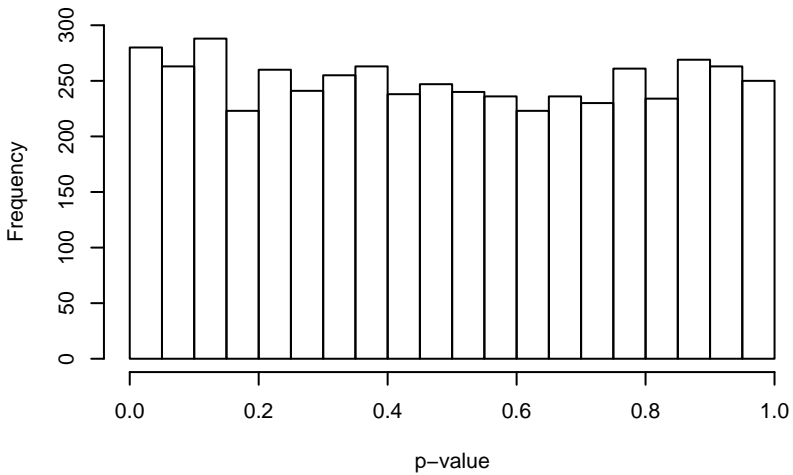

Unrelateds 3 variables – Mixed factor loadings

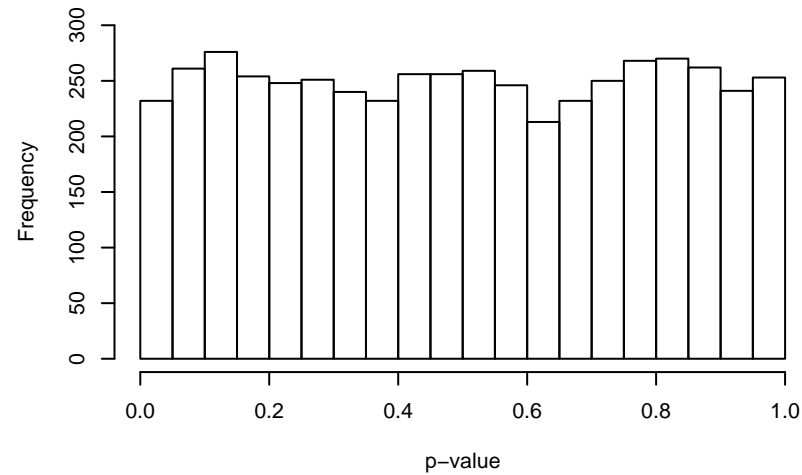

Unrelateds 3 variables – Low factor loadings

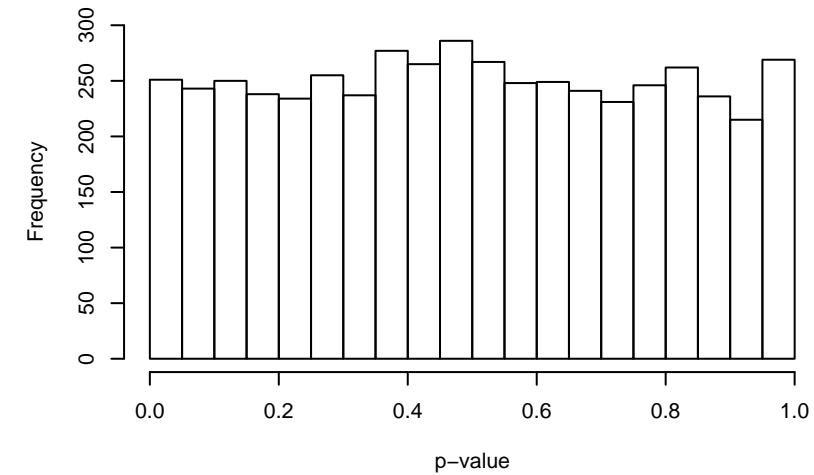

Unrelateds 5 variables – High factor loadings

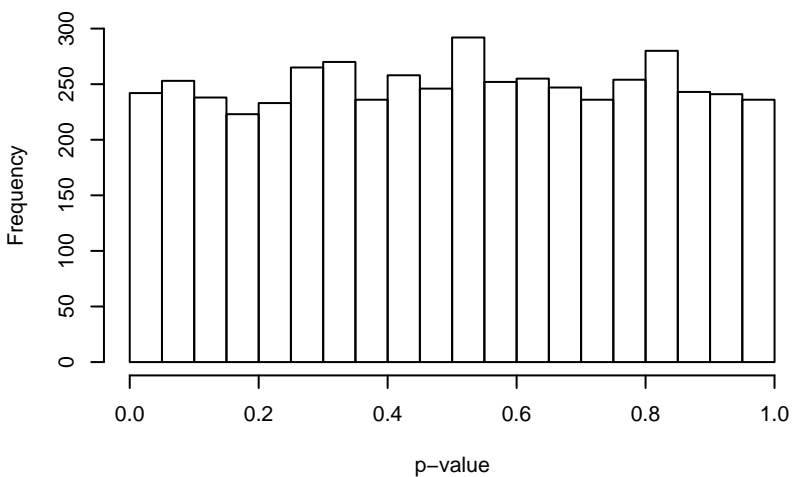

Unrelateds 5 variables – Mixed factor loadings

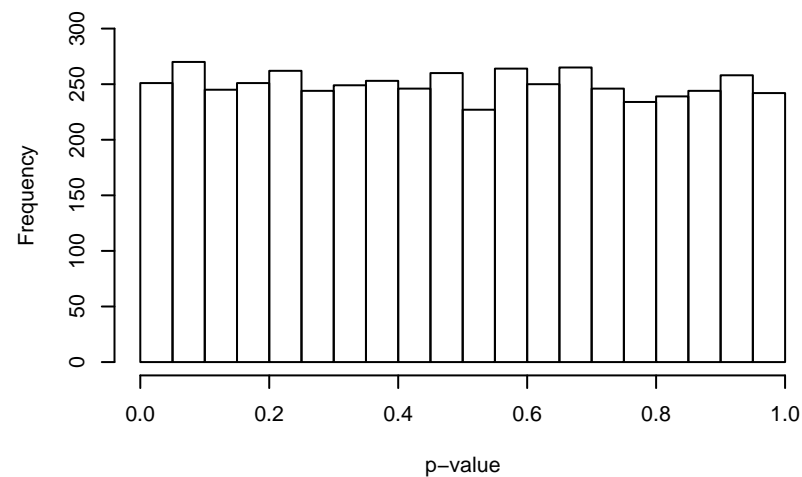

Unrelateds 5 variables – Low factor loadings

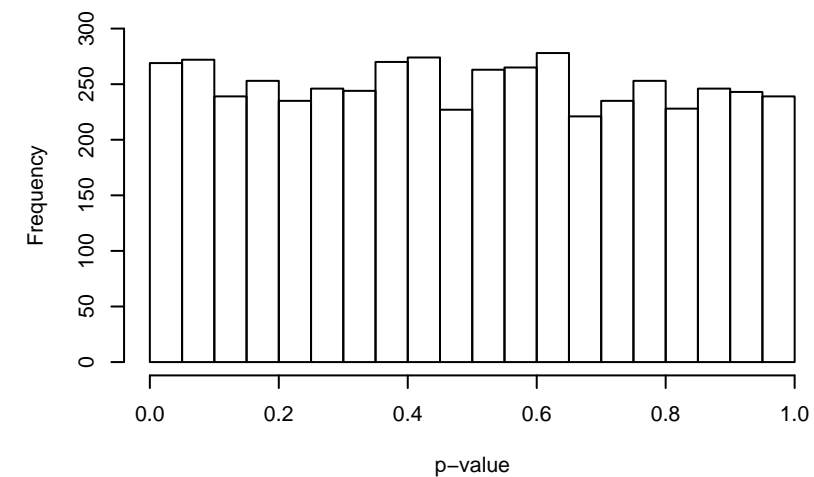

Sibpairs 3 variables – High factor loadings

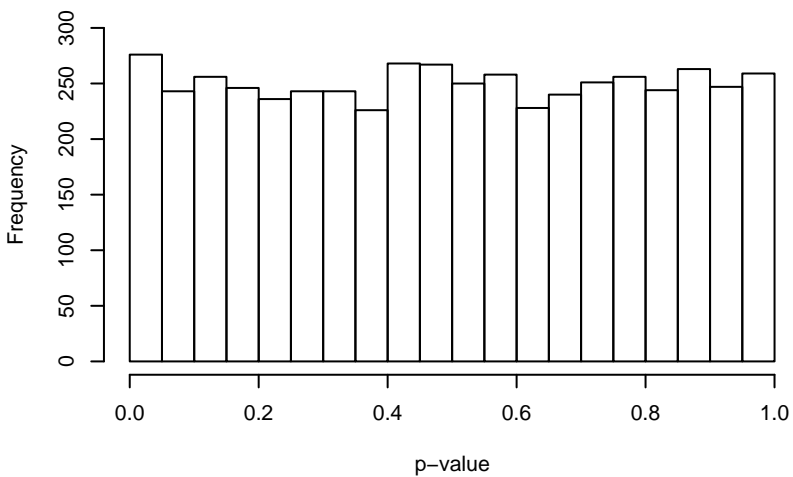

Sibpairs 3 variables – Mixed factor loadings

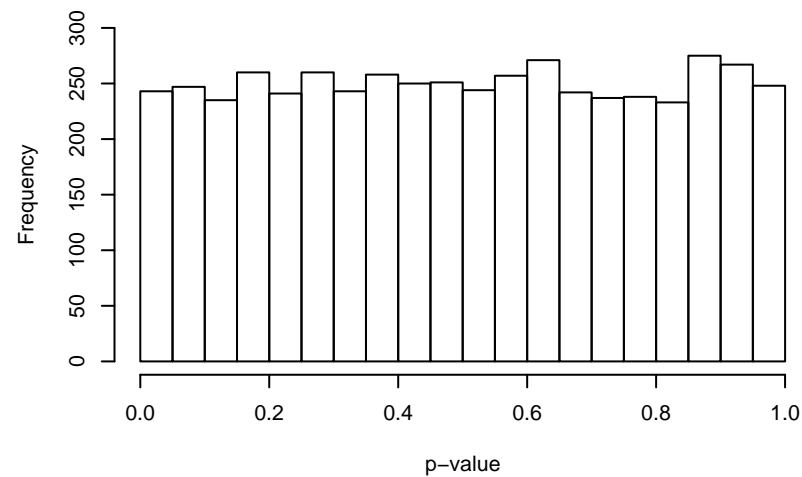

Sibpairs 3 variables – Low factor loadings

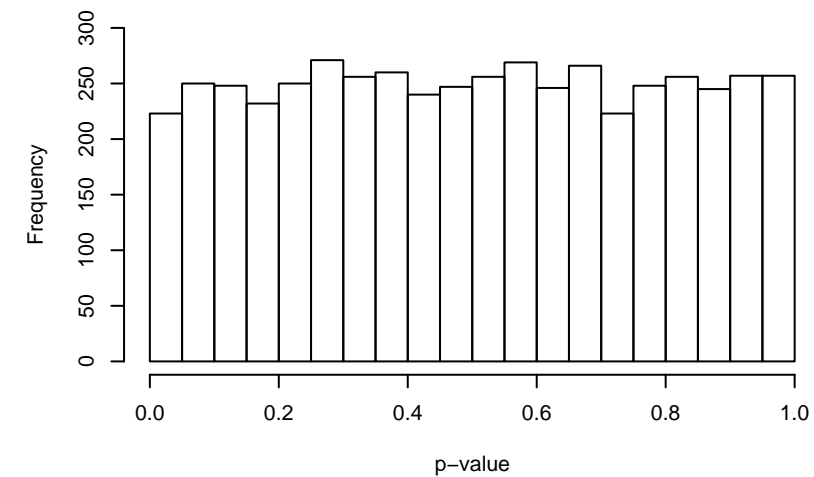

Distribution of p-values [0,1] under the null hypothesis: Factor level test

Unrelateds 3 variables – High factor loadings

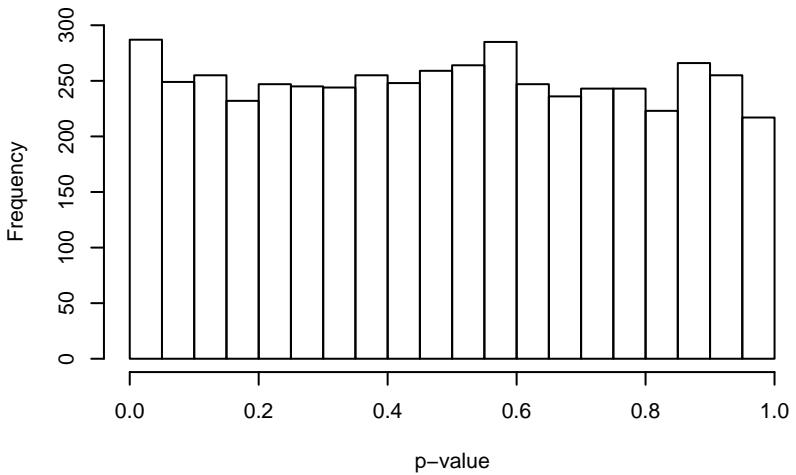

Unrelateds 3 variables – Mixed factor loadings

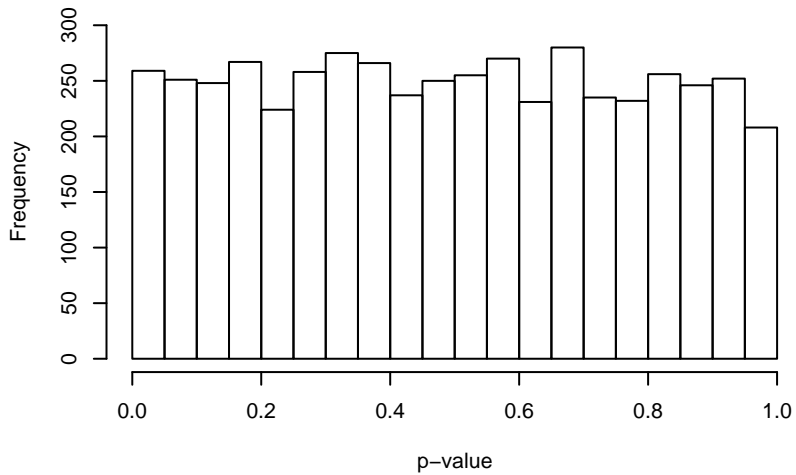

Unrelateds 3 variables – Low factor loadings

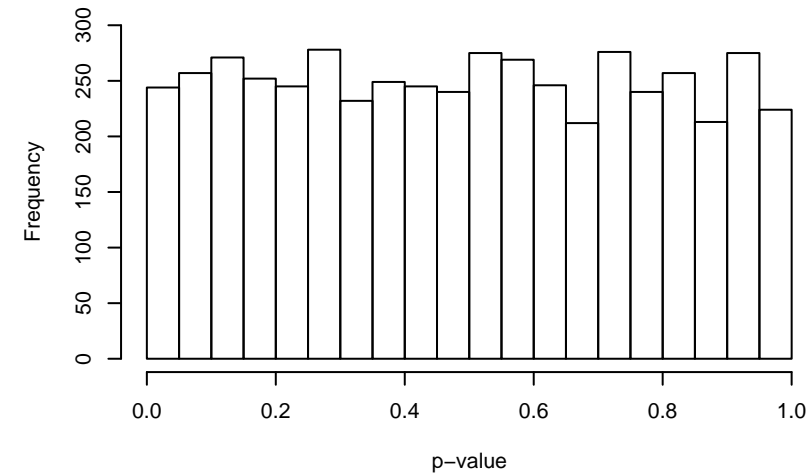

Unrelateds 5 variables – High factor loadings

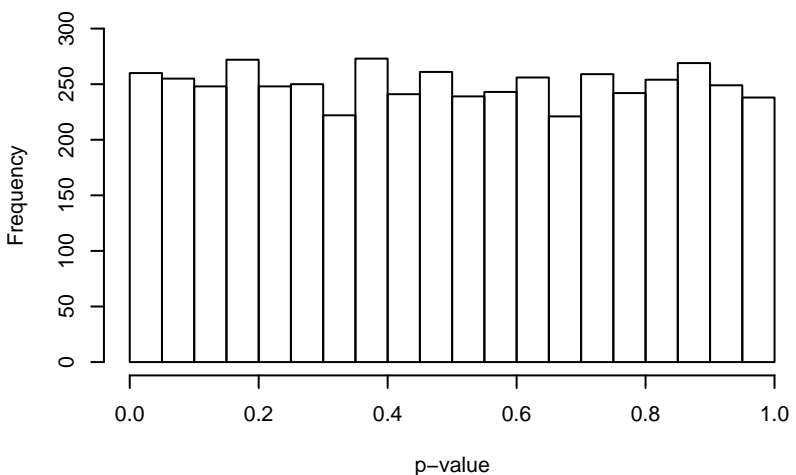

Unrelateds 5 variables – Mixed factor loadings

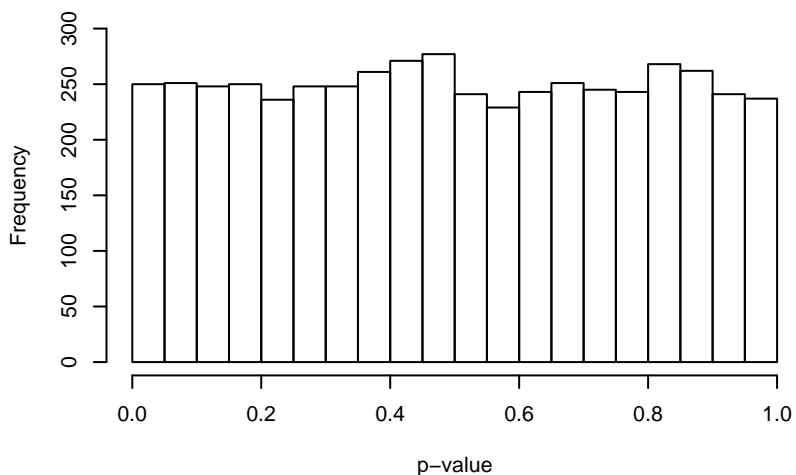

Unrelateds 5 variables – Low factor loadings

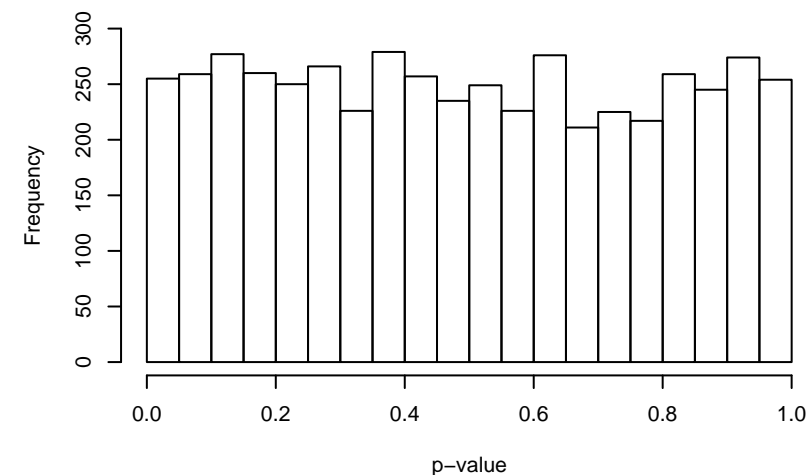

Sibpairs 3 variables – High factor loadings

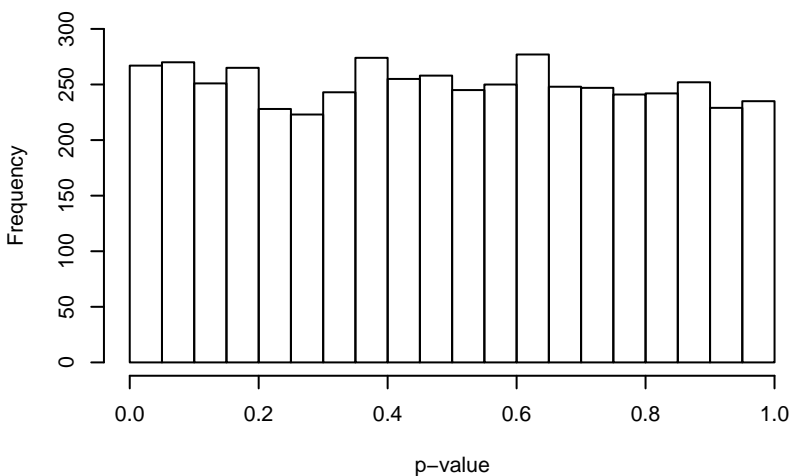

Sibpairs 3 variables – Mixed factor loadings

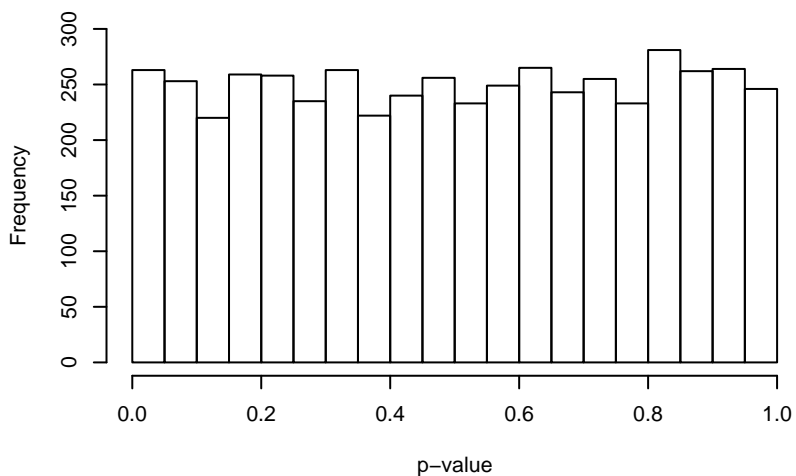

Sibpairs 3 variables – Low factor loadings

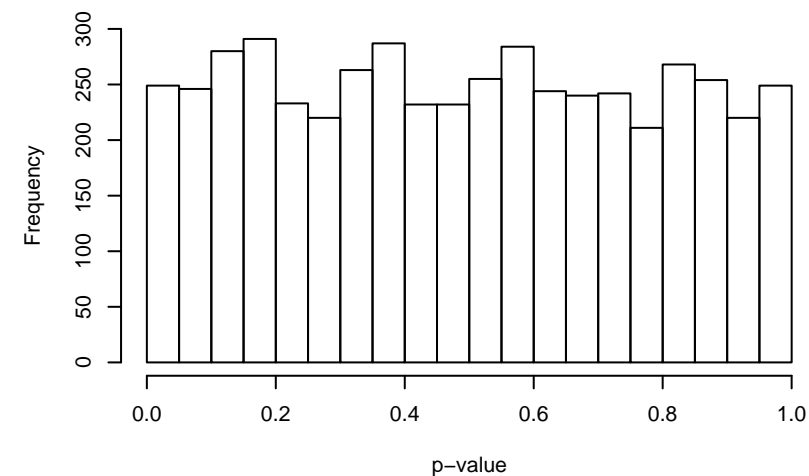

Supplement: ejhg2009133x1.pdf [file ejhg2009133x1.pdf]
